# Supplementary material for: Alternative Splicing Isoforms of Porcine CREB Are Differentially Involved in Transcriptional Transactivation
Source: MDPI journal article supplement (doi:10.3390/genes13081304), 2022-07-22
Supplement: s1 [file s1]

**Table S1.** Primers used in this study

| Sequences (5'-3')                                                                          | Purpose |
|--------------------------------------------------------------------------------------------|---------|
| CDS amplification                                                                          |         |
| F: ATGACCATGGAATCTGGAGCAGACAAC<br>R: TTAATCTGATTTGTGGCAGTAAAGGTCC                          |         |
| Competitive RT-PCR                                                                         |         |
| F: GCCACAGATTGCCACATTAGC<br>R: CTGACTCCTGTGAATCTTCGCTT                                     |         |
| Real-time PCR for CREB measurement                                                         |         |
| F: CTCCGGAAGTCTGAGTTTCAACTA<br>R: TCCTGGTGCGTCAGAAGATAA                                    | V1      |
| F: CAAGTCCAGACAGTTCAGATTTCAA<br>R: ACTCCTGGTGCGTCAGAAGATAA                                 | V2      |
| F: CTCACGCAACATCAGTTATTCAGTC<br>R: the same as V2R                                         | V3      |
| F: TGCCACATTAGCCCAGATTTC AAC<br>R: CACTCCTGGTGCGTCAGAAGATAA                                | V4      |
| F: GCTATGAAAGACAGCAATGAACAAA<br>R: the same as V1R                                         | V5      |
| Promoter amplification                                                                     |         |
| F: <u>GGTACCG</u> CACGGTTAGAACTTGTGACTGG<br>R: <u>AAGCTT</u> CAATGGACTCCTAGCTCGCC          | PABPN1  |
| F: <u>GGTACCG</u> TCTCCAGCCACCCGCTTTCTTC<br>R: CCC <u>AAGCTT</u> CACAAAGTCTGCCACTAGAGCCCGT | BCL2L2  |
| Deletion of CREB motif                                                                     |         |
| F: GAGAAGCAAGACAGCGTGGCGG<br>R: CCGCCACGCTGTCTTGCTTCTC                                     | PABPN1  |
| F: CTTGTAGGGATCAGCCCTGCTGTTG<br>R: CAGCAGGGCTGATCCCTACAAGCC                                | BCL2L2  |
| Real-time PCR for validation of RNA-seq                                                    |         |
| F: GCTTCGGGAGTTGAGGAT<br>R: GCAGGTTTGGCTGTGGAG                                             | CDCA3   |
| F: GCACGGATAGTCATCAACAGG<br>R: GTCAAAGTCAAAACCCACGA                                        | PSMA7   |
| F: TAAGAAGTGCTCAGAAAGGTG<br>R: GCGGTGTTATTCCACATCTC                                        | HMGB1   |
| F: CGGTGATAGTAGAAAAGGCTC<br>R: CACTGGTGGGTGGAATGAC                                         | GABARAP |
| F: GCCGAGGCAGAATGGAGTGT<br>R: GGTGGCGATGTAGTTGAGGA                                         | GSTA1   |
| F: CAGTTTGAGCCGATAGTTTCT<br>R: GGCGTGATGTAGTGATTGG                                         | RANBP1  |
| F: AATCCGCCTGAATCCCA                                                                       | IFIT1   |

---

|                           |  |          |
|---------------------------|--|----------|
| R: GCAGCCTCATTGACCAT      |  |          |
| F: ACGCCAAGGGAAGGTCA      |  | PPP1R14B |
| R: CAGGAGTTCATCCACATCAATC |  |          |
| F: AAGTTTATTCGCAAGACCCG   |  | HIGD2A   |
| R: AGACCCACCAAGATGGCTAC   |  |          |

---

F, forward; R, reverse; restriction sites were underlined.
